# Supplementary material for: Controllable synthesis of Ni–Co–Mn multi-component metal oxides with various morphologies for high-performance flexible supercapacitors
Source: Royal Society of Chemistry journal article supplement (doi:10.1039/c7ra03018e), 2017-01-01
Supplement: c7ra03018e1.pdf [file c7ra03018e1.pdf]

## Electronic Supplementary Information

# Controllable synthesis of Ni-Co-Mn multi-component metal oxides with various morphologies for high- performance flexible supercapacitors †

Pingge He,<sup>a</sup> Qun Huang,<sup>a</sup> Boyun Huang,<sup>a</sup> and Tengfei Chen<sup>\*a</sup>

<sup>a</sup>State Key Laboratory of Powder Metallurgy, Central South University, Changsha 410083, China.

### Calculations:

The specific capacitance of the electrodes is calculated from the charge/discharge curves based on: <sup>1,2</sup>

$$C_m = (I \times \Delta t) / (\Delta V \times m) \quad (1)$$

where  $C_m$  (F g<sup>-1</sup>) is the specific capacitance,  $I$  (A) is the applied current,  $\Delta t$  (s) is the discharge time,  $\Delta V$  (V) is the potential change after IR drop during the discharge, and  $m$  (g) is the mass of active materials.

Coulombic efficiency ( $\eta$ ) is the ratio of the number of unit charge inputs during charging compared to the number extracted during discharging, reflecting the charge storage efficiency of electrodes. A low coulombic efficiency is caused by significant loss in charge during secondary reactions, such as the electrolysis of water or other redox reactions in the system.<sup>3</sup> The coulombic efficiency measured in galvanostatic charge/discharge tests is calculated from:

$$\eta = Q_{discharge} / Q_{charge} = I t_{discharge} / I t_{charge} = t_{discharge} / t_{charge} \quad (2)$$

Where  $I$  is the applied current during galvanostatic charge and discharge.

Fig.S1 shows XPS of NiCoMn<sub>2</sub> oxide, containing full element result and detailed high-resolution XPS analyses of Ni 2p, Co 2p, Mn 2p and O 1s, respectively. In Fig. S1a, the peaks located at 49.5, 536.19, 642.3, 808.49 and 870.09 eV correspond to Mn<sub>3p</sub>, O<sub>1s</sub>, Mn<sub>2p</sub>, Co<sub>2p</sub> and Ni<sub>2p</sub>, respectively, confirming the presence of Ni, Co, Mn and O elements on the surface of NiCoMn<sub>2</sub> oxide. In the O 1s spectrum (see Fig. S1b), two peaks O1 and O2 have been fitted. The O1 at 533.2 eV are associated with C-O functional groups and O2 at 529.2 eV is a typical peak of metal-oxygen bonds.<sup>4</sup> The Ni 2p spectrum is fitted according to two spin-orbit doublets, characteristic of Ni<sup>2+</sup> and Ni<sup>3+</sup>, and two shakeup satellites (identified as “Sat.”).<sup>5</sup> Similarly, the Co 2p spectrum is fitted with two spin-orbit doublets, characteristic of Co<sup>2+</sup> and Co<sup>3+</sup>, and two shakeup satellites.<sup>5</sup> The peaks in the Mn 2p spectrum at 641.5 and 653.2 eV correspond to Mn 2p<sub>3/2</sub> and Mn 2p<sub>1/2</sub>, respectively. However, distinguishing the binding energies corresponding to the oxidation states of Mn<sup>2+</sup> and Mn<sup>3+</sup> is rather difficult.<sup>6</sup> Based on the XPS analysis, NiCoMn<sub>2</sub> oxide possesses a diverse composition of Ni<sup>2+</sup>, Ni<sup>3+</sup>, Co<sup>2+</sup>, Co<sup>3+</sup>, Mn<sup>2+</sup> and Mn<sup>3+</sup> on the surface, providing more electroactive sites than single- or double-component metal hydroxides.

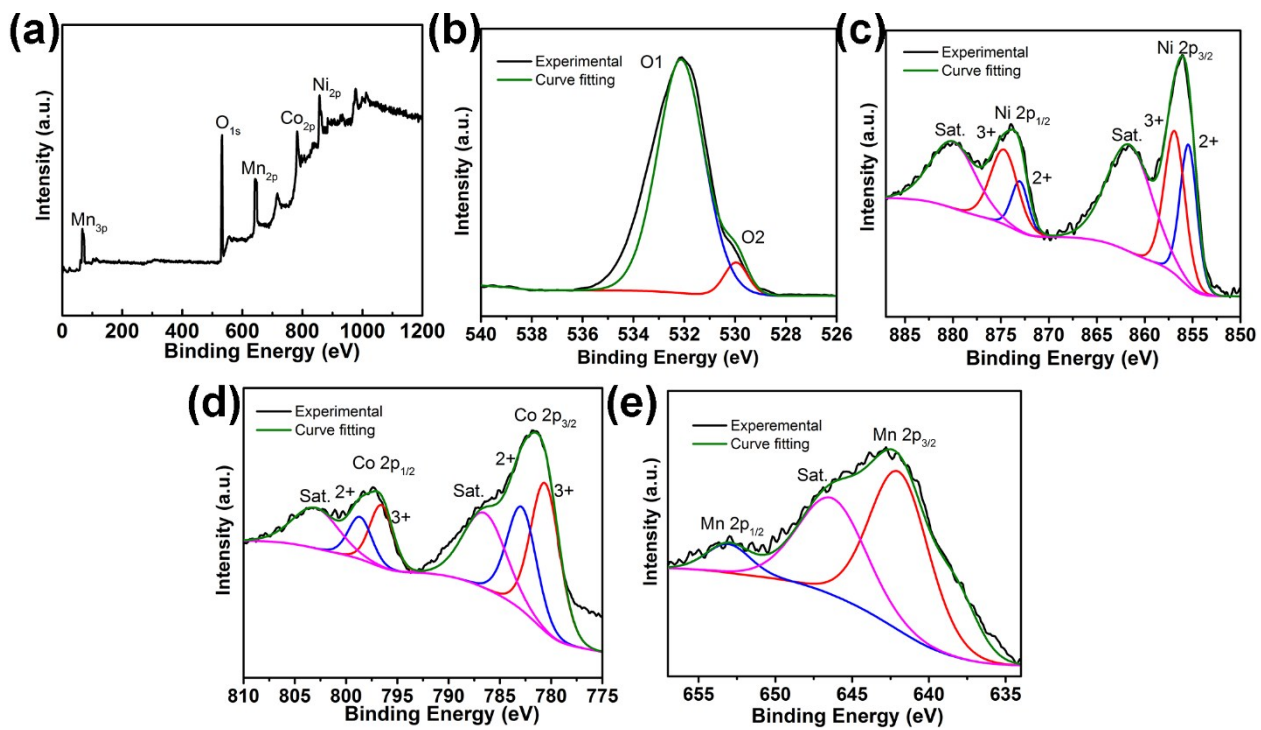

Fig. S1 (a) Full element XPS result. High-resolution XPS spectra of (b) O 1s; (c) Ni 2p; (d) Co 2p; and (e) Mn 2p.

Fig. S2 shows CV curves of metal oxides at scan rates from 10 to 100  $\text{mV s}^{-1}$  in a voltage window ranging from -0.2 to 0.5 V vs. SCE.

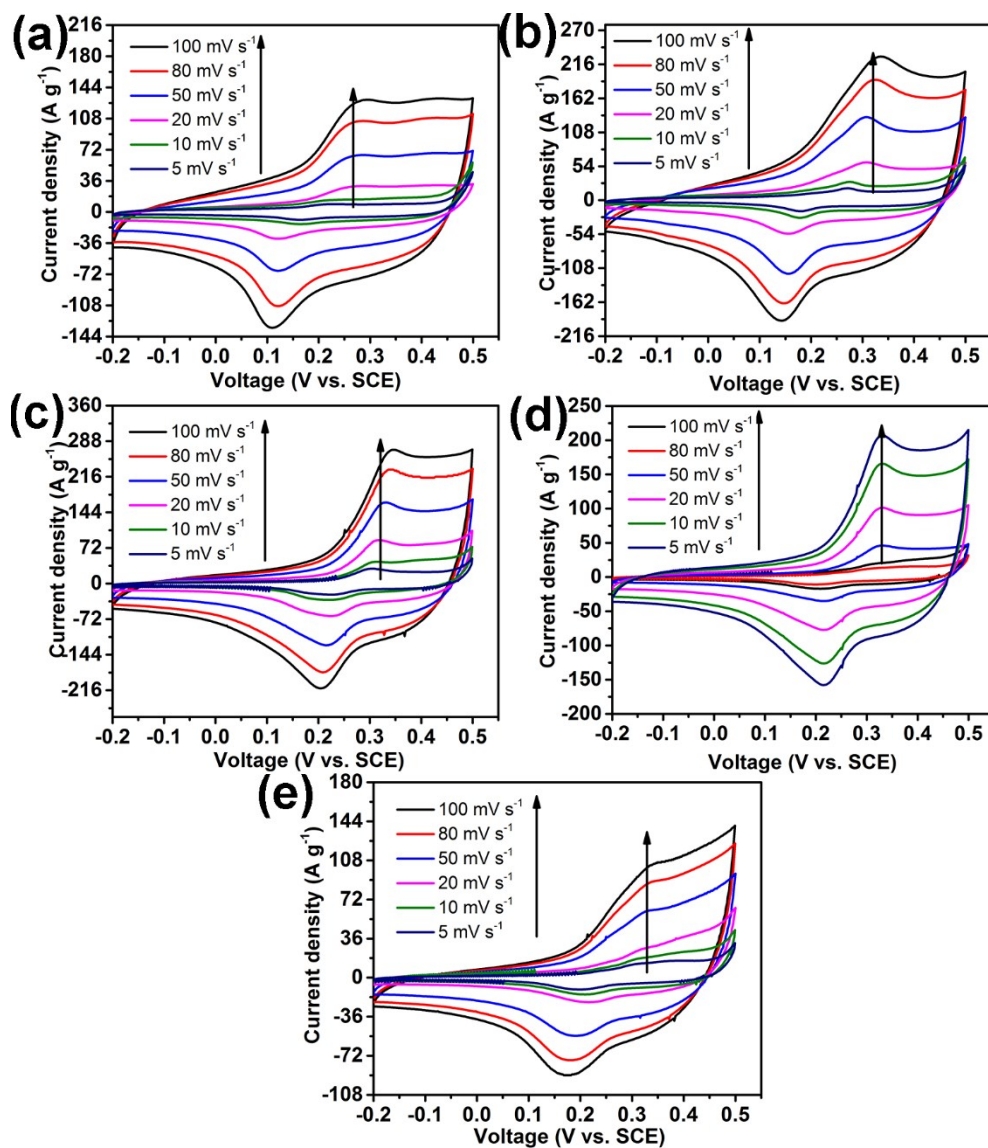

Fig. S2 CV curves of metal oxides at scan rates from 10 to 100  $\text{mV s}^{-1}$ . (a) NiCo<sub>2</sub>; (b) NiCoMn; (c) NiCoMn<sub>2</sub>; (d) NiCoMn<sub>3</sub>; and (e) NiCoMn<sub>5</sub>.

Fig. S3 shows the galvanostatic charge/discharge profiles of metal oxides at current densities from 2 to 12 mA cm<sup>-2</sup> in a voltage window from 0 to 0.5 V vs. SCE.

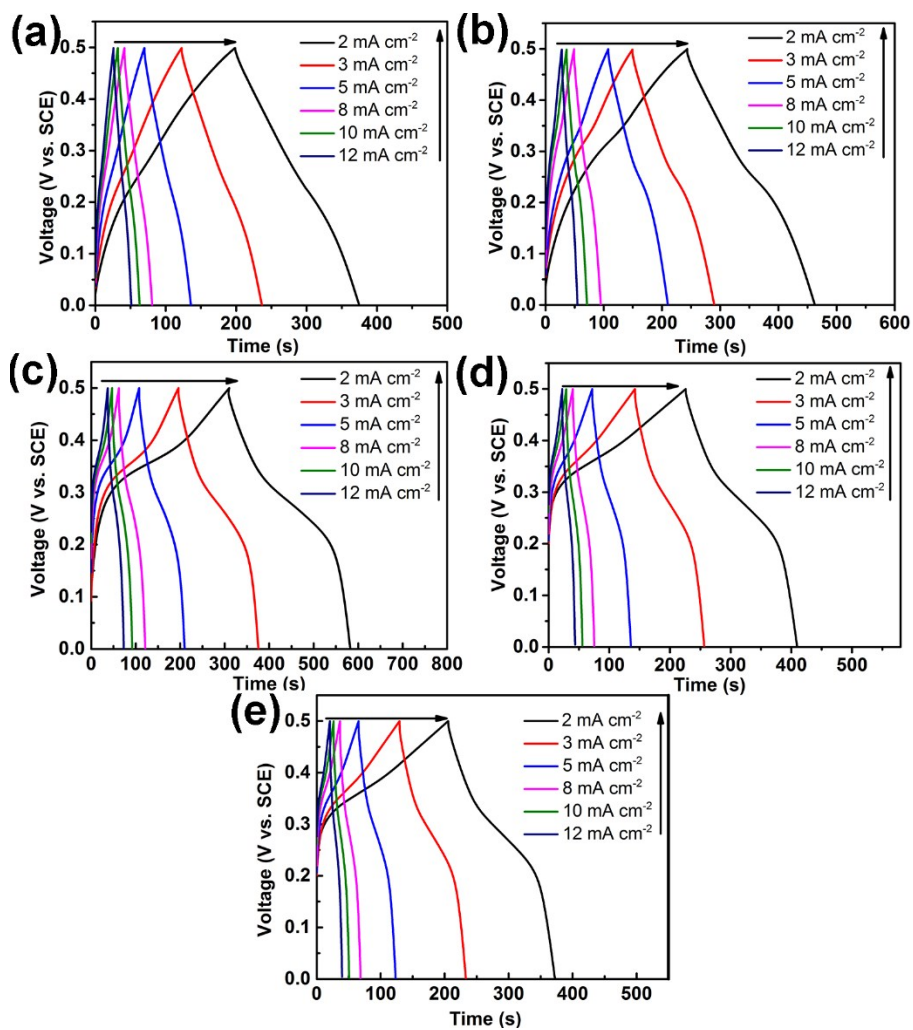

Fig. S3 the galvanostatic charge/discharge profiles of metal oxides at current densities from 2 to 12 mA cm<sup>-2</sup> (a) NiCo<sub>2</sub>; (b) NiCoMn; (c) NiCoMn<sub>2</sub>; (d) NiCoMn<sub>3</sub>; and (e) NiCoMn<sub>5</sub>.

Nyquist plots of metal oxides recorded from 0.1 Hz to 1 MHz are provided in Fig. S4.

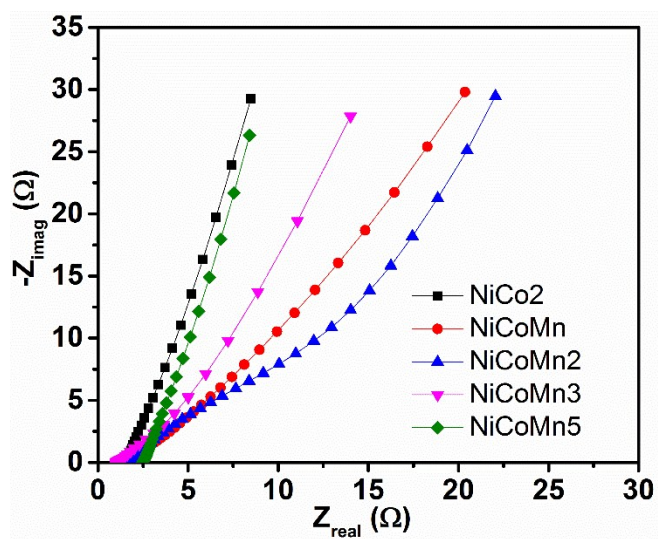

Fig. S4 Nyquist plots of metal oxides recorded from 0.1 Hz to 1 MHz.

Carbon materials are usually by nature hydrophobic. Thus, for the supercapacitor applications, CC was activated to be hydrophilic. The CC is electrochemically oxidized in 1M  $\text{H}_2\text{SO}_4$  solution through a three-electrode configuration using CC as working electrode, Pt mesh as counter electrode and Ag/AgCl as reference electrode to functionalize the surface with oxygen-containing functional groups. The current and voltage transients during the electrochemical oxidization process are shown in Figure S5.

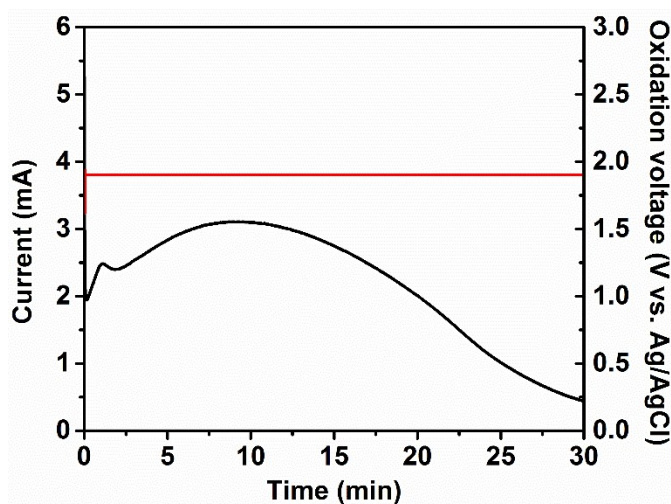

Fig. S5 Electrochemical oxidization process at 1.9 V in 1 M  $\text{H}_2\text{SO}_4$  for 30 min.



Table S1. A summary of electrochemical performance of state-of-the-art metal oxide-based electrodes.

| Electrode materials              | Morphology         | Substrate    | Capacitance (F g <sup>-1</sup> ) | Cycle life         | Ref.      |
|----------------------------------|--------------------|--------------|----------------------------------|--------------------|-----------|
| NiCo <sub>2</sub> O <sub>4</sub> | nanowall           | carbon cloth | 1225                             | 87% (2000 cycle)   | 7         |
| NiCo <sub>2</sub> O <sub>4</sub> | nanoflake          | carbon cloth | 844                              | 79% (2000 cycle)   | 7         |
| NiCo <sub>2</sub> O <sub>4</sub> | nanosheet          | carbon fiber | 1338                             | 84.4% (3000 cycle) | 8         |
| Co-Mn composite                  | soy pod-like       | carbon cloth | 832                              | 80% (1000 cycle)   | 9         |
| MnCo <sub>2</sub> O <sub>4</sub> | nanowire           | nickel foam  | 348                              | 92.7% (50 cycle)   | 10        |
| ZnO                              | nanorod            | nickel foam  | 1169                             | 109% (5000 cycle)  | 11        |
| @CoMoO <sub>4</sub>              | @nanoplate         |              |                                  |                    |           |
| CoMoO <sub>4</sub> /graphene     | nanoparticle       | /            | 394.5                            | 78.4% (500 cycle)  | 12        |
| NiMoO <sub>4</sub>               | nanowire           | carbon cloth | 414.7                            | 66% (6000 cycle)   | 13        |
| NiMoO <sub>4</sub>               | nanorod            | nickel foam  | 1102.2                           | 90% (1000 cycle)   | 14        |
| Ni-Co-Mn oxides                  | nanosheet-nanowire | carbon cloth | 1434.2                           | 94% (3000 cycle)   | this work |

## Reference

1. P. Simon and Y. Gogotsi, *Nat. Mater.*, 2008, **7**, 845-854.
2. S. L. Zhang and N. Pan, *Adv. Energy Mater.*, 2015, **5**, 1401401.
3. T. Sato, G. Masuda and K. Takagi, *Electrochim. Acta*, 2004, **49**, 3603-3611.
4. J. Marco, J. Gancedo, M. Gracia, J. Gautier, E. Rios and F. Berry, *Journal of Solid State Chemistry*, 2000, **153**, 74-81.
5. B. Cui, H. Lin, Y.-z. Liu, J.-b. Li, P. Sun, X.-c. Zhao and C.-j. Liu, *J. Phys. Chem. C*, 2009, **113**, 14083-14087.
6. S. Bag, K. Roy, C. S. Gopinath and C. R. Raj, *ACS Appl. Mat. Interfaces*, 2014, **6**, 2692-2699.
7. N. Padmanathan and S. Selladurai, *RSC Advances*, 2014, **4**, 8341-8349.
8. F. Deng, L. Yu, G. Cheng, T. Lin, M. Sun, F. Ye and Y. Li, *J. Power Sources*, 2014, **251**, 202-207.
9. J. Gomez and E. E. Kalu, *J. Power Sources*, 2013, **230**, 218-224.
10. L. Li, Y. Q. Zhang, X. Y. Liu, S. J. Shi, X. Y. Zhao, H. Zhang, X. Ge, G. F. Cai, C. D. Gu, X. L. Wang and J. P. Tu, *Electrochim. Acta*, 2014, **116**, 467-474.
11. Y. Cao, L. An, L. Liao, X. Liu, T. Ji, R. Zou, J. Yang, Z. Qin and J. Hu, *RSC Advances*, 2016, **6**, 3020-3024.
12. X. Xia, W. Lei, Q. Hao, W. Wang and X. Wang, *Electrochim. Acta*, 2013, **99**, 253-261.
13. C. Wang, Y. Xi, C. Hu, S. Dai, M. Wang, L. Cheng, W. Xu, G. Wang and W. Li, *RSC Advances*, 2015, **5**, 107098-107104.
14. L. Lin, T. Liu, J. Liu, R. Sun, J. Hao, K. Ji and Z. Wang, *Applied Surface Science*, 2016, **360, Part A**, 234-239.
